# Supplementary material for: Systematic Review of PD‐1/PD‐L1 Inhibitors in Oncology: From Personalized Medicine to Public Health
Source: PubMed Central journal article supplement — Oncologist. 2021 Jul 27;26(10):e1786–99. doi: 10.1002/onco.13887 (PMC8488782; doi:10.1002/onco.13887), 2021-07-27
Supplement: ONCO-26-e1786-s001.pdf [file ONCO-26-e1786-s001.pdf]

Supplemental Table for:  
Systematic Review of PD-1/PD-L1 Inhibitors in Oncology: from Personalized Medicine to Public Health  
Elaine Chang et al.

## Supplementary material (online only)

Table. Companion\* and complementary# *in vitro* diagnostic (IVD) PD-L1 assays

|                                                                                                                                                                                                                                                                                                                                                                                                                                                                                                                           |                                                                                                                                                                                                                                                                                                                                                                                                                                                                                                                                                                                                                                                                                                                                                                                                                                                                         |
|---------------------------------------------------------------------------------------------------------------------------------------------------------------------------------------------------------------------------------------------------------------------------------------------------------------------------------------------------------------------------------------------------------------------------------------------------------------------------------------------------------------------------|-------------------------------------------------------------------------------------------------------------------------------------------------------------------------------------------------------------------------------------------------------------------------------------------------------------------------------------------------------------------------------------------------------------------------------------------------------------------------------------------------------------------------------------------------------------------------------------------------------------------------------------------------------------------------------------------------------------------------------------------------------------------------------------------------------------------------------------------------------------------------|
| <p style="text-align: center;"><b>Dako 28-8</b></p> <p><b>Advanced urothelial</b></p> <ul style="list-style-type: none"> <li>nivolumab 2<sup>nd</sup> L-M<br/>PD-L1+ TC ≥ 1%</li> </ul> <p><b>HNSCC</b></p> <ul style="list-style-type: none"> <li>nivolumab 2<sup>nd</sup> L-M<br/>PD-L1+ TC ≥ 1%, 5%, 10%</li> </ul> <p><b>NSCLC</b></p> <ul style="list-style-type: none"> <li>nivolumab + ipilimumab 1<sup>st</sup> L<br/>PD-L1+ TC ≥ 1%</li> <li>nivolumab 2<sup>nd</sup> L-M<br/>PD-L1+ TC ≥ 1%, 5%, 10%</li> </ul> | <p style="text-align: center;"><b>Dako 22C3</b></p> <p><b>Advanced urothelial</b></p> <ul style="list-style-type: none"> <li>pembrolizumab cisplatin-ineligible 1<sup>st</sup> L-M, CPS ≥ 10</li> </ul> <p><b>Cervical</b></p> <ul style="list-style-type: none"> <li>pembrolizumab 2<sup>nd</sup> L-M, CPS ≥ 1</li> </ul> <p><b>NSCLC:</b></p> <ul style="list-style-type: none"> <li>pembrolizumab 1<sup>st</sup> L-M, TPS ≥ 1%</li> <li>pembrolizumab 2<sup>nd</sup> L-M, TPS ≥ 1%</li> </ul> <p><b>Esophageal SCC</b></p> <ul style="list-style-type: none"> <li>pembrolizumab 2<sup>nd</sup> L-M, CPS ≥ 10</li> </ul> <p><b>Gastric/GEJ adeno</b></p> <ul style="list-style-type: none"> <li>pembrolizumab 2<sup>nd</sup> L-M, CPS ≥ 10</li> </ul> <p><b>HNSCC</b></p> <ul style="list-style-type: none"> <li>pembrolizumab 1<sup>st</sup> L-M, CPS ≥ 1</li> </ul> |
| <p style="text-align: center;"><b>Ventana SP263</b></p> <p><b>Bladder</b></p> <ul style="list-style-type: none"> <li>durvalumab 2<sup>nd</sup> L-M<br/>TC ≥ 25%; or<br/>ICP &gt; 1% with PD-L1+ IC ≥ 25%; or<br/>ICP = 1% with PD-L1+ IC = 100%</li> </ul>                                                                                                                                                                                                                                                                | <p style="text-align: center;"><b>Ventana SP142</b></p> <p><b>Bladder:</b></p> <ul style="list-style-type: none"> <li>atezolizumab cisplatin-ineligible 1<sup>st</sup> L-M<br/>≥ 50% TC or ≥ 10% IC</li> </ul> <p><b>Breast:</b></p> <ul style="list-style-type: none"> <li>atezolizumab + paclitaxel protein-bound 1<sup>st</sup> L-M<br/>≥ 1% IC</li> </ul> <p><b>NSCLC:</b></p> <ul style="list-style-type: none"> <li>atezolizumab 1<sup>st</sup> L-M, TC ≥ 50% or IC ≥ 10%</li> <li>atezolizumab 2<sup>nd</sup> L-M<br/>≥ 1% TC or ≥ 1% IC</li> </ul>                                                                                                                                                                                                                                                                                                              |

\* Provides information that is essential for the safe and effective use of a corresponding drug or biological product.

# Provides information to support the use of a drug, biological product, or a class of agents.

*Intended uses in italics denote complementary IVDs. Regular font denotes companion IVDs.*

**Tumor cell staining:** tumor cells (TC), tumor proportion score (TPS)

**Immune cell staining:** immune cells (IC), immune cells present (ICP)

**Both:** combined positive score (CPS)
